# 1 Using contact network dynamics to implement 2 efficient interventions against pathogen spread in 3 hospital settings

4 Quentin Leclerc<sup>a,b,c\*</sup> [1], Audrey Duval<sup>a,b,c#</sup> [1], Didier Guillemot<sup>a,b,d</sup>, Lulla Opatowski<sup>a,b</sup> [2],  
5 Laura Temime<sup>c,e</sup> [2]

6 \* corresponding author ([quentin.leclerc@pasteur.fr](mailto:quentin.leclerc@pasteur.fr))

7 <sup>1</sup> these authors contributed equally

8 <sup>2</sup> these authors contributed equally

9

10 <sup>a</sup> Institut Pasteur, Université Paris Cité, Epidemiology and Modelling of Bacterial Escape to  
11 Antimicrobials (EMEA), 75015 Paris, France

12 <sup>b</sup> INSERM, Université Paris-Saclay, Université de Versailles St-Quentin-en-Yvelines, Team  
13 Echappement aux Anti-infectieux et Pharmacoépidémiologie U1018, CESP, 78000 Versailles,  
14 France

15 <sup>c</sup> Laboratoire Modélisation, Epidémiologie et Surveillance des Risques Sanitaires,  
16 Conservatoire National des Arts et Métiers, 75003 Paris, France

17 <sup>d</sup> AP-HP, Paris Saclay, Department of Public Health, Medical Information, Clinical research, F-  
18 92380, Garches

19 <sup>e</sup> Institut Pasteur, Conservatoire National des Arts et Métiers, Unité PACRI, 75015 Paris, France

20 # Current address : Imagine Institute, Data Science Platform, INSERM UMR 1163, Université  
21 de Paris, 75015 Paris, France

22

23 **Classification:** Biological Sciences, Biophysics and Computational Biology

24 **Keywords:** long-term care facility, contact network, individual-based model, nosocomial

25 **NOTE:** This preprint reports new research that has not been certified by peer review and should not be used to guide clinical practice.  
pathogens, interventions

## 26 **Abstract**

27 Long-term care facilities (LTCF) are hotspots for pathogen transmission. Infection control  
28 interventions are essential, but the high density and heterogeneity of inter-individual contacts  
29 within LTCF may hinder their efficacy. Here, we explore how the patient-staff contact  
30 structure may inform effective intervention implementation. Using an individual-based  
31 model, we reproduced methicillin-resistant *Staphylococcus aureus* colonisation dynamics over  
32 a detailed contact network recorded within an LTCF, and examined the potential impact of  
33 three types of interventions against transmission (reallocation reducing the number of unique  
34 contacts per staff, reinforced contact precautions, and vaccination protecting against  
35 acquisition), targeted towards specific populations. All three interventions were effective  
36 when applied to all nurses or healthcare assistants (median reduction in MRSA colonisation  
37 incidence up to 21%), but the benefit did not exceed 8% when targeting any other single staff  
38 category. We identified “supercontactor” individuals with most contacts (“frequency-based”,  
39 overrepresented amongst nurses, porters and rehabilitation staff) or with the longest  
40 cumulative time spent in contact (“duration-based”, overrepresented amongst healthcare  
41 assistants and geriatric and persistent-vegetative-state patients). Targeting supercontactors  
42 enhanced interventions against pathogen spread in the LTCF. With contact precautions,  
43 targeting frequency-based staff supercontactors led to the highest incidence reduction (13%).  
44 Vaccinating duration-based patient supercontactors led to a higher reduction (22%) than all  
45 other approaches. Targeting supercontactors remained the most effective strategy when  
46 varying epidemiological parameters, indicating this approach can be broadly applied to  
47 prevent transmission of other nosocomial pathogens. Importantly, both staff and patients  
48 may be supercontactors, highlighting the importance of including patients in measures to  
49 prevent pathogen transmission in LTCF.

50

## 51 **Significance statement**

52 Pathogen transmission is a challenge in long-term care facilities (LTCF) due to frequent and  
53 heterogeneous contacts of staff and patients. By characterising this contact structure and  
54 understanding the categories of staff and patients more likely to be “supercontactors”, with

55 either more or longer contacts than others, we can implement more efficient interventions  
56 against pathogen spread. We illustrate this using a mathematical model to reproduce  
57 transmission of methicillin-resistant *Staphylococcus aureus* across a detailed contact network  
58 recorded in a LTCF. We show how the most efficient implementation strategy depends on the  
59 intervention (reallocation, contact precautions, vaccination) and target population (staff,  
60 patients, supercontactors). By varying epidemiological parameters, we demonstrate that  
61 these results are broadly applicable to prevent transmission of other nosocomial pathogens.

## 62 Introduction

63 Healthcare associated infections (HAI) are a major threat worldwide, with more than 4 million  
64 infections occurring each year in Europe [1]. The recent COVID19 pandemic has underlined  
65 the high risk of pathogen dissemination in health care settings, similarly to what was  
66 previously reported for other coronaviruses, seasonal influenza or Ebola epidemics [2,3].  
67 Bacterial nosocomial outbreaks are also frequently described, becoming more and more  
68 difficult to control with the rise of multidrug resistance [4]. In addition to significantly  
69 impacting the morbidity and mortality of hospitalized patients and potentially healthcare  
70 workers (HCWs), HAI generate additional costs due to longer hospital stays or additional  
71 expensive therapeutics, as well as legal consequences for practitioners and healthcare settings  
72 in case of patient lawsuits.

73 Methicillin-resistant *Staphylococcus aureus* (MRSA) is an important cause of such HAI, as these  
74 infections most often affect individuals in a weakened immunological state, such as  
75 hospitalized patients [5]. Crucially, MRSA colonization is a risk factor for infection, since  
76 individuals are more likely to be infected by a *S. aureus* strain they are carrying [6].  
77 Consequently, it is essential to understand how individuals become colonized by MRSA in  
78 healthcare settings and to control the acquisition risk.

79 To limit pathogen dissemination through human cross-transmission in healthcare settings, a  
80 range of measures can be implemented, mostly based on improving contact precautions, such  
81 as patient isolation, hand-washing, wearing of gloves or masks. Vaccines to reduce the risk of  
82 pathogen colonisation also represent ongoing research and development topics, although  
83 none are commercially available and there have only been limited attempts to evaluate their  
84 impact in healthcare settings thus far [7]. However, the high density of human contacts  
85 involving HCWs, patients, and visitors, combined with variations in individual behaviours and  
86 overall stochasticity in transmission often limit the impact of these control measures. For  
87 instance, while efficient in general, hand-washing may fail due to a few “super-spreader”  
88 individuals who do not comply with hygiene recommendations [8].

89 Because the structure of contact networks within healthcare settings influences the spread of  
90 HAI pathogens [9], manipulating contact network structures or targeting highly connected  
91 individuals may significantly improve the efficacy of control measures [10]. Here, using

92 individual-based modelling of nosocomial pathogen spread, combined with fine-grained  
93 longitudinal data on human close-proximity interactions (CPIs), we show how detailed  
94 knowledge of the structure of human interactions may help design more effective  
95 interventions for HAI control. We illustrate this point through an application to control the  
96 spread of colonisation by MRSA in a long-term care facility (LTCF).

## 97 **Results**

### 98 **A simulated hospital contact network that realistically mimics the observed** 99 **contact network**

100 We designed a stochastic individual-based model (IBM) to reproduce the realistic dynamic  
101 network of within-hospital between-human interactions. CPI data was collected by equipping  
102 all patients and hospital staff in a French LTCF with proximity log-sensors over 84 days (i-Bird  
103 study [11,12]). The model was then calibrated to generate simulated contact networks with  
104 the same characteristics as the real network provided by the CPI data (see [13] for details). As  
105 shown on Figure 1a, the simulated contact network accurately reproduced real average hourly  
106 patterns of patient-to-patient, staff-to-staff and staff-to-patient interactions.

107

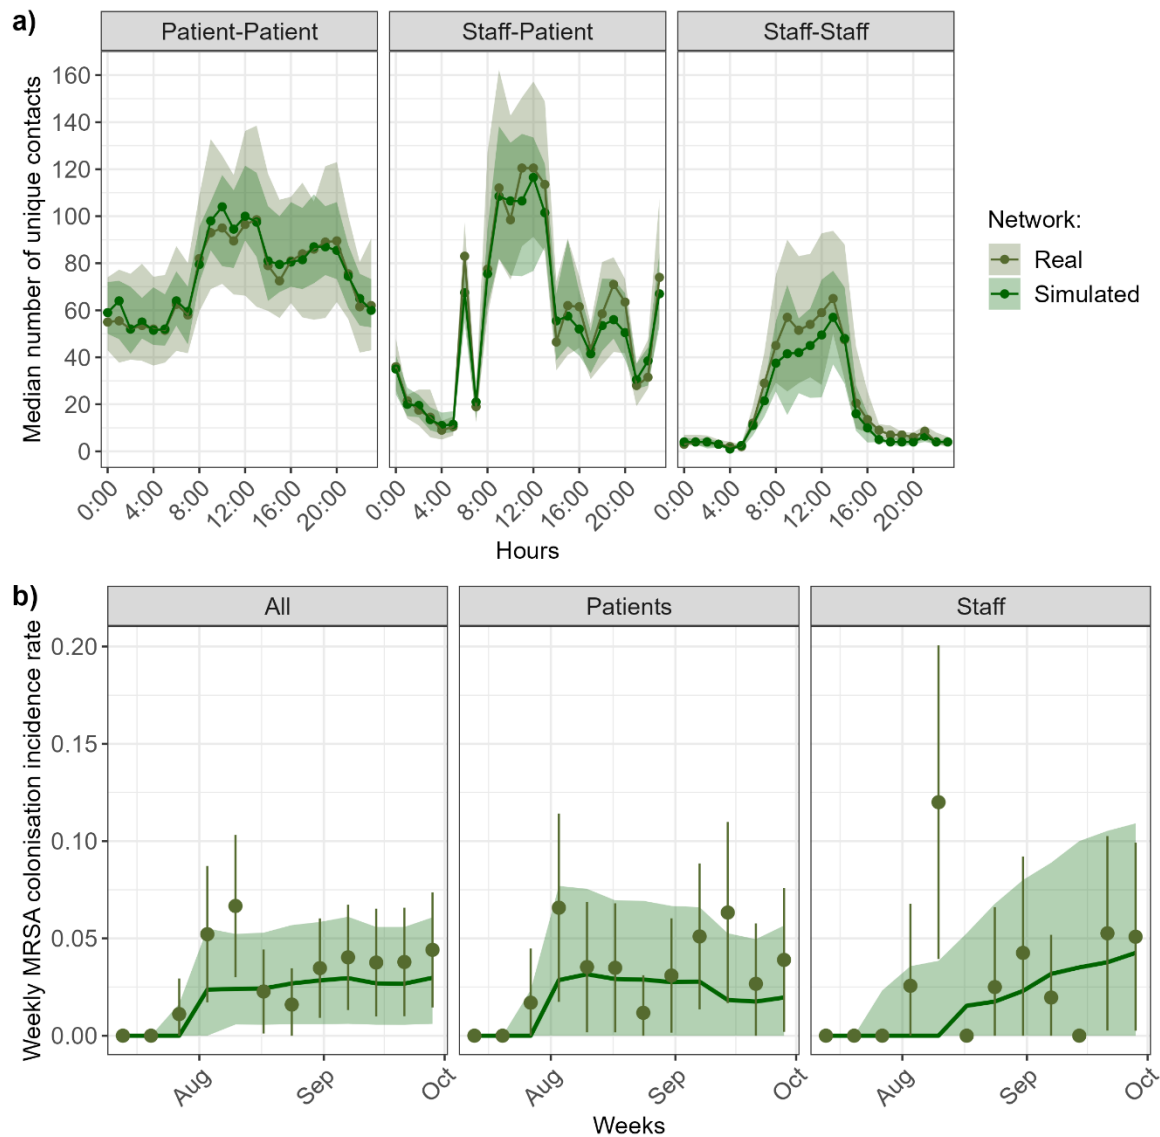

108

109 **Figure 1: Real and simulated contacts and MRSA incidence. (A) Hourly distribution of**  
 110 **number of unique contacts.** The lines and points show the median estimates, and the  
 111 shaded areas show the interquartile ranges. The real values come from the i-Bird study, and  
 112 the simulated values are shown for 50 simulated contact networks. **(B) MRSA colonisation**  
 113 **weekly incidence over 3 months.** Olive points correspond to the observed weekly incidence  
 114 during the i-Bird study, with lines indicating the margin of error, estimated using the number  
 115 of individuals swabbed that week. Simulated results are obtained from 15,000 stochastic  
 116 model simulations (500 simulations of 50 simulated networks). The dark green line shows  
 117 the median incidence, and the shaded area shows the 95% prediction interval, defined as  
 118 the interval between the 2.5<sup>th</sup> and 97.5<sup>th</sup> percentiles.

119

## 120 **Observed weekly MRSA incidence is well reproduced by simulations of** 121 **network-based transmission**

122 A Susceptible-Colonised process was implemented into the IBM to reproduce the transmission  
123 process of a colonising pathogen, here MRSA, in the LTCF. The model was parameterized to  
124 mimic the i-Bird study conditions. An initial 151 patients and 236 hospital staff members were  
125 followed up over 84-day simulations. We categorised hospital staffs into 6 groups, (i)  
126 healthcare assistants, (ii) nurses, (iii) rehabilitation staff, (iv) physicians, (v) hospital porters  
127 and (vi) other. Each day, staff presence and patient admissions and discharges were also  
128 simulated using the real data from the i-Bird study. The simulated dynamic contact network  
129 described in the previous section was used to mimic between-human interactions and  
130 assumed to be the support of MRSA transmission within this LTCF [11,14]. When initializing  
131 the model with MRSA carriage of patients and staff as reported by the i-Bird data, the weekly  
132 incidence of MRSA colonization predicted by the model reproduced well the observed trends  
133 and weekly incidence over the study period (Figure 1b).

134

## 135 **Hospital staff reallocation, especially in healthcare assistants, reduces MRSA** 136 **spread**

137 To assess the extent to which the dissemination of MRSA can be restricted through an  
138 optimized patient-staff allocation, we designed a series of interventions formalized as  
139 modifications of the contact network. We assessed the impact of staff reallocation, defined  
140 as the attribution of a reduced number of patients to each staff member during the entire  
141 investigation period. We maintained the global care needs of patients over the entire period,  
142 defined by the number of unique contacts in the data between patients and different staff  
143 categories, by ward. A series of scenarios exploring different combinations of staff categories  
144 affected by reallocation were implemented and, for each scenario, 30 new contact networks  
145 were generated.

146 Simulating the transmission of MRSA over the different networks, we found that reallocation  
147 scenarios targeting different hospital staff categories can help reduce cumulative incidence of  
148 MRSA colonisation (Figure 2a for scenarios where 1, 2, or all staff categories were reallocated,



149 Supplementary Figure 1a for all scenarios). Importantly, the benefit of the intervention varied  
150 depending on the categories of staff reallocated. When only a single staff category was  
151 reallocated, the highest incidence reduction was obtained for healthcare assistant  
152 reallocation (median decrease: 10%, 95% confidence interval: 9–11). All scenarios with two  
153 categories reallocated involving healthcare assistants prevented between 10–20% of  
154 colonisations over the entire simulation period. For comparison, reallocating all staff  
155 categories prevented 39% of colonisations (CI: 38–40). Reallocation of either porters or  
156 physicians alone barely led to any change in incidence compared to baseline, since these  
157 interventions did not substantially change the number of unique staff-patient contacts within  
158 the hospital and, therefore, did not substantially affect MRSA spread (Supplementary Figure  
159 2). A pseudo-random contact network in which patients were homogeneously distributed  
160 among all staff members led to more contacts and a higher incidence as compared to the one  
161 generated by the baseline network (36% increase, CI: 35–37), since this increased unique staff-  
162 patient contacts within the hospital (Supplementary Figure 2).

163 To see if the variability between scenarios was due to the different number of individuals  
164 reallocated in each scenario, we divided the relative incidence reduction for each scenario by  
165 the corresponding number of staff reallocated (Figure 2b). This changed the order of the  
166 scenarios with the highest benefit, now calculated as relative incidence reduction per  
167 reallocated staff. Scenarios where nurses or healthcare assistants were reallocated were  
168 lower in the ranking, since they required a large number of staff to be allocated. On the other  
169 hand, reallocation of rehabilitation staff and other staff led to the highest overall relative  
170 reduction per staff reallocated ( $2.7 \times 10^{-3}$  %, CI:  $2.6 \times 10^{-3}$ – $2.9 \times 10^{-3}$ ), even higher than if all  
171 staff are reallocated ( $1.4 \times 10^{-3}$  %, CI:  $1.4 \times 10^{-3}$ – $1.5 \times 10^{-3}$ ). In any case, we still note  
172 heterogeneity in the efficacy of different scenarios, indicating that there are other relevant  
173 characteristics which differ between staff categories.

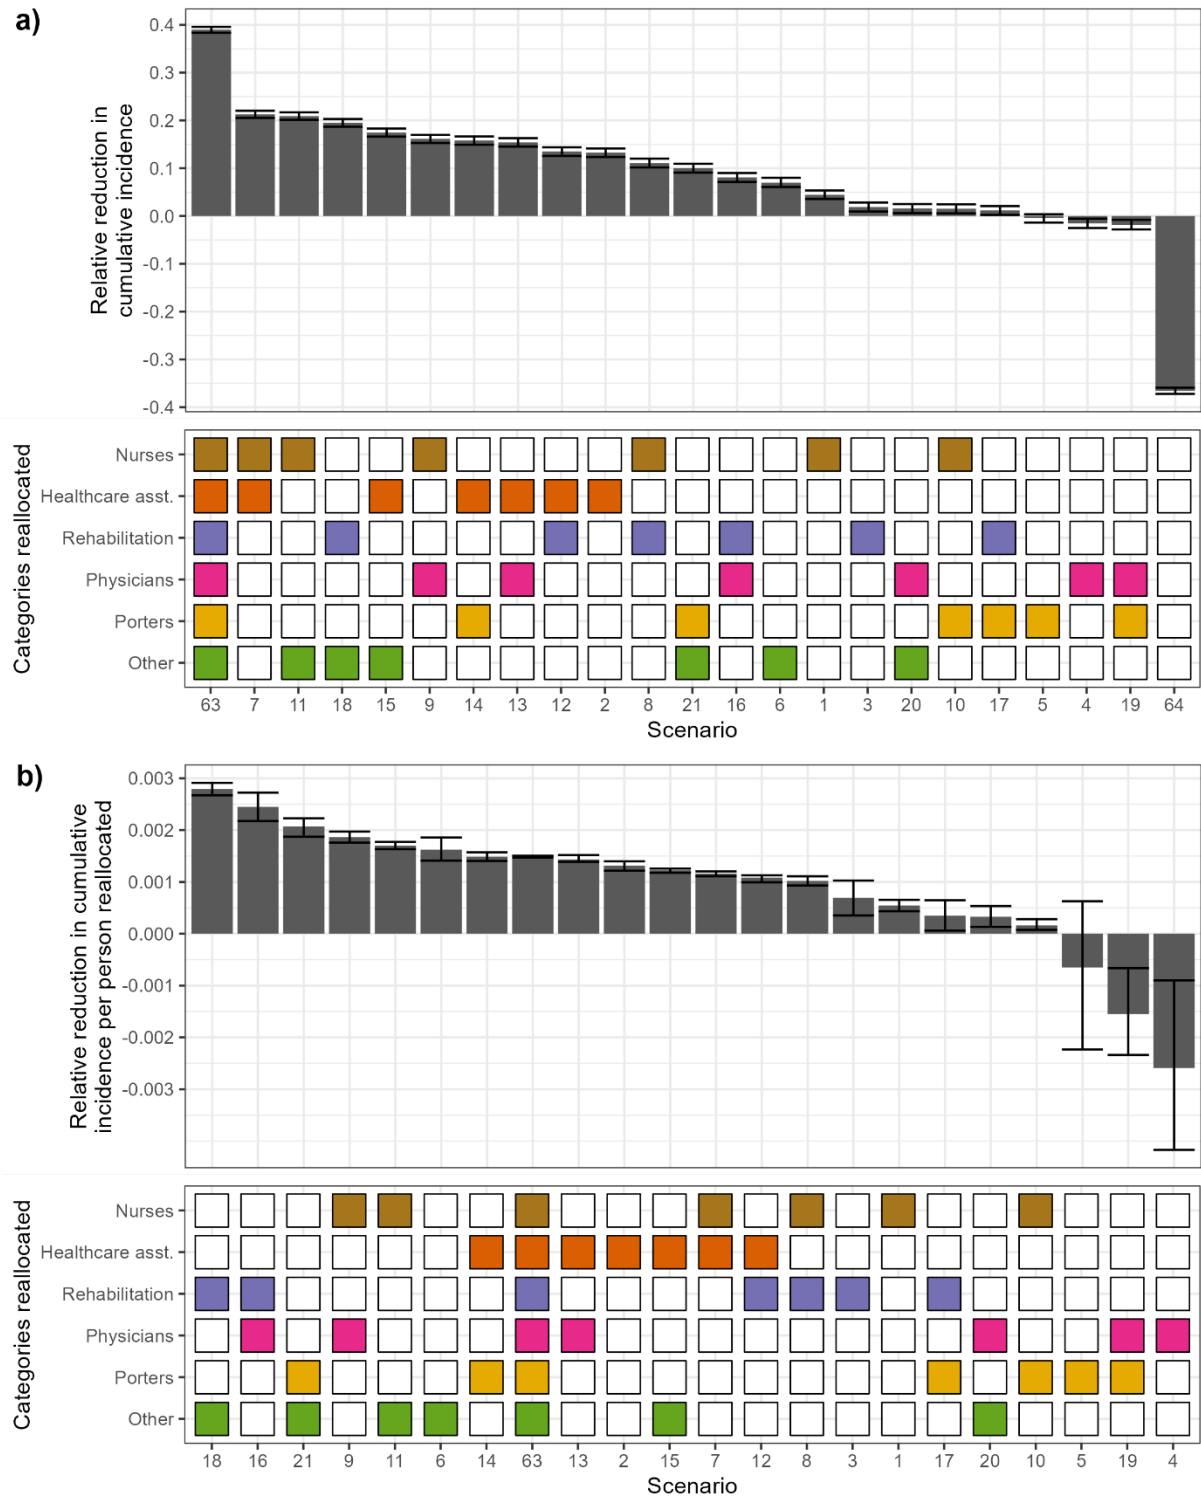

174

175

176

177

178

179

180

**Figure 2: Relative reduction in cumulative incidence of MRSA colonisation for different hospital staff reallocation scenarios, shown per scenario (a), or per scenario divided by number of staff reallocated in that scenario (b). Top:** Each bar depicts, for a given scenario, the median relative reduction between 500 model simulations with no intervention, and 500 simulations with staff reallocation, along with the 95% confidence interval. A negative reduction indicates that the intervention led to an increase in cumulative incidence. **Bottom:**

181 In each scenario, staff categories coloured are those reallocated. In scenario 64, the contact  
182 network is random. In each plot, the scenarios are ranked from most to least effective.

183

### 184 Reinforced contact precautions of nurses or healthcare assistants are more 185 effective than staff reallocation or vaccination

186 Next, we investigated the impact of reinforced contact precautions taken by hospital staff  
187 (e.g., glove wearing or improved hand hygiene compliance) and vaccination. Contact  
188 precautions were simulated as a 2- to 10-fold reduction in both patient-to-hospital staff and  
189 hospital staff-to-patient MRSA transmission probabilities during contacts. Vaccination was  
190 simulated as a 2- to 10-fold reduction in MRSA acquisition probabilities during contacts  
191 between any colonised individual and a non-colonised vaccinated individual. As for the  
192 previous analysis, MRSA transmission dynamics were simulated for the different scenarios of  
193 reinforced contact precautions and vaccination in the 6 hospital staff categories (Figure 3).

194

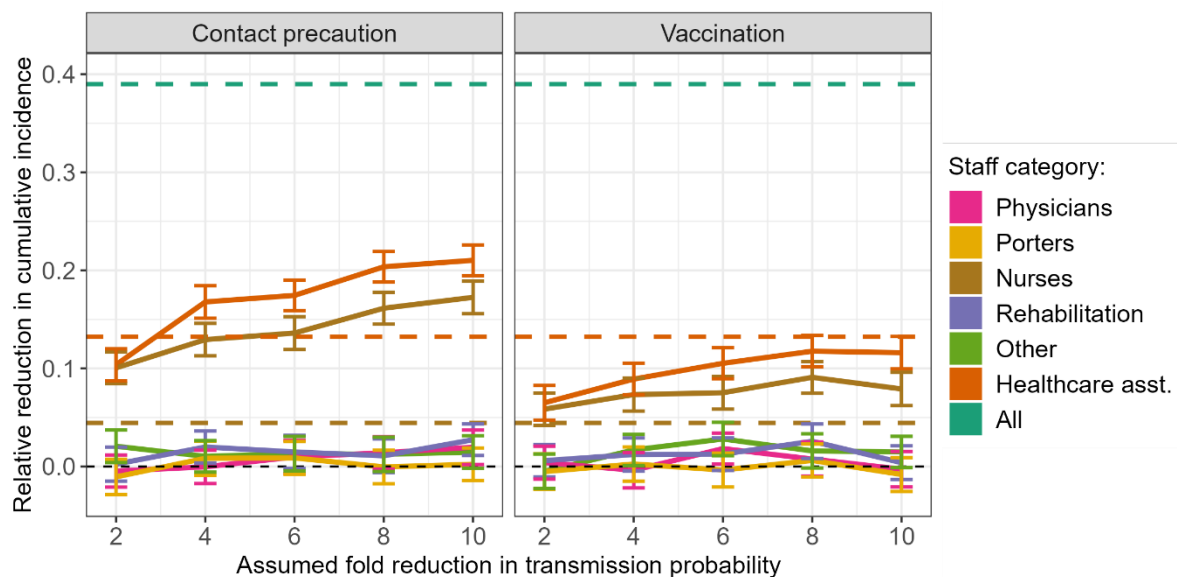

195

196 **Figure 3: Effect of contact precautions and vaccination targeting different hospital staff**  
197 **categories, compared to staff reallocation.** The dashed lines show the median reduction  
198 when reallocating all staff (turquoise), healthcare assistants only (orange), or nurses only  
199 (brown). All other estimates are shown as median with 95% confidence interval calculated for  
200 500 intervention simulations.

201 Contact precautions targeting healthcare assistants led to a large reduction in MRSA  
202 colonisations, ranging from 10% to 21% as the assumed level of reduction in transmission  
203 probabilities increased from 2 to 10-fold (Figure 3). This was closely followed by contact  
204 precautions targeting nurses (10-18% reduction). Contact precautions for healthcare  
205 assistants or nurses appear to be more effective than reallocation of either of those staff  
206 categories alone, as even an assumed 4-fold reduction in transmission probabilities was  
207 sufficient to achieve a decrease in incidence slightly higher than reallocation (Figure 3). Whilst  
208 vaccination of healthcare assistants or nurses did reduce incidence, the reduction ranged from  
209 6 to 12%, which is approximately equivalent to reallocation (Figure 3).

210 By opposition, contact precautions or vaccination focused exclusively on either hospital  
211 porters, physicians, rehabilitation or other staff appeared ineffective, with percent reductions  
212 below 5% irrespective of the assumed transmission probability reduction (Figure 3).

213

## 214 **Heterogeneous distribution of “supercontactors” amongst patients and staff**

215 To understand why intervention effectiveness to reduce the spread of MRSA varied depending  
216 on the staff category targeted, we examined the extent to which different individuals were  
217 connected in the contact network. We identified individuals substantially more connected  
218 than others, and henceforth refer to them as “supercontactors”. We distinguish between two  
219 types of supercontactors: (i) individuals with the highest number of daily distinct contacts  
220 (henceforth called “frequency-based supercontactors”) and (ii) individuals with the highest  
221 overall daily contact duration (henceforth called “duration-based supercontactors”).

222 We identified the top 60 duration- and frequency-based supercontactors for both patients  
223 and staff (i.e. top 20% of individuals). If all individuals had the same probability of being  
224 supercontactors, we expect that the distribution of patients/staff categories amongst  
225 supercontactors (Figure 4, red and blue) would be aligned with the distribution of those same  
226 categories amongst all patients/staff (grey).

227 Amongst patients, neurology patients are the first category of supercontactors (Figure 4, left;  
228 34% of duration-based, 45% of frequency-based). The observed distribution of patient  
229 categories amongst duration-based supercontactors (red) differed significantly from the

230 distribution of those categories amongst all patients (grey; log likelihood ratio test: p value <  
231 0.001). We observed a greater proportion of PVS and geriatric patients amongst duration-  
232 based supercontactors than amongst all patients (Figure 4, left). The difference was not  
233 statistically significant for frequency-based supercontactors (log likelihood ratio test: p value  
234 > 0.2).

235 Amongst staff, the majority of supercontactors were either healthcare assistants (Figure 4,  
236 right; 52% of duration-based, 33% of frequency-based) or nurses (Figure 4, right; 26% of  
237 duration-based, 40% of frequency-based). The observed distribution of staff categories  
238 amongst supercontactors differed significantly from the distribution of those categories  
239 amongst all staff (log likelihood ratio test: duration-based p value < 0.01, frequency-based p  
240 value < 0.05). Compared to the distribution amongst all staff, we observed a greater  
241 proportion of healthcare assistants amongst duration-based supercontactors, and a greater  
242 proportion of nurses, porters and rehabilitation staff amongst frequency-based  
243 supercontactors (Figure 4).

244 There was almost no overlap between the identities of the frequency and duration-based  
245 supercontactors. Only three persistent-vegetative state patients, two neurology patients, one  
246 nurse and one rehabilitation staff were in both categories.

247

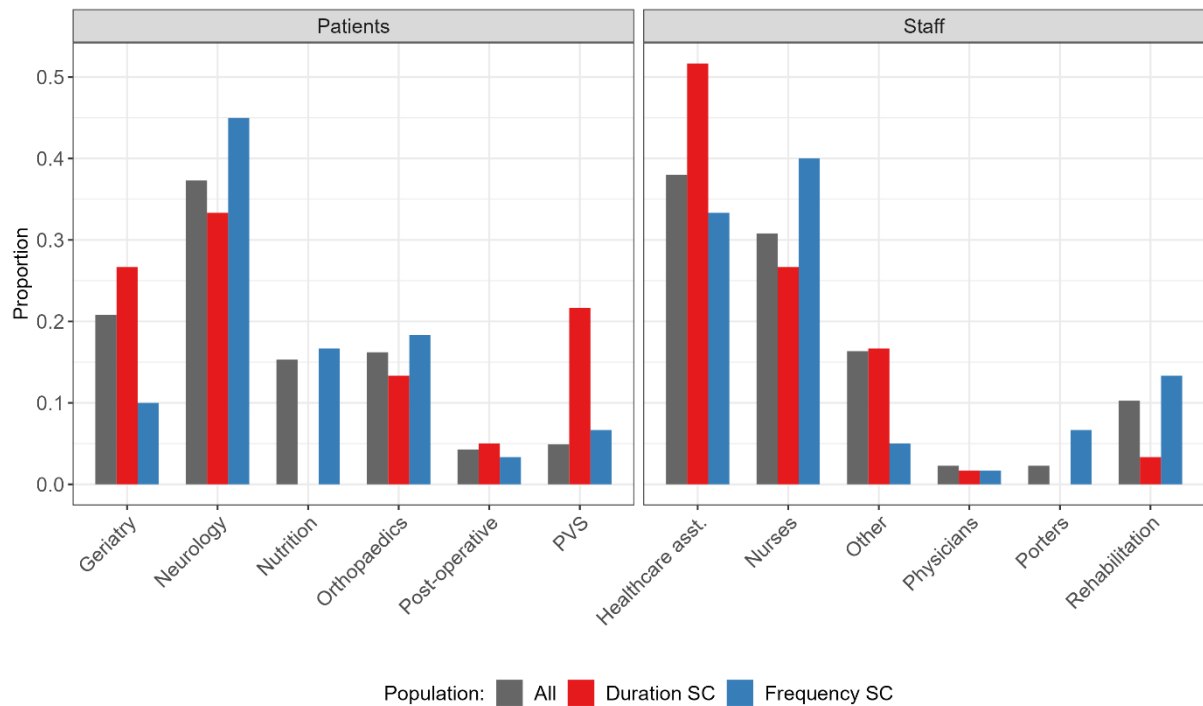

248

249 **Figure 4: The distribution of supercontactors (SC) amongst hospital patients and staff is not**

250 **homogeneous.** The grey bars show the distribution of categories amongst all patients (left) or  
251 staff (right), the red bars show the distribution of duration-based supercontactors, the blue  
252 bars show the distribution of frequency-based supercontactors. If supercontactors were  
253 homogeneously distributed amongst categories, all the coloured bars would be aligned with  
254 the grey bars. Here, only the distribution of the top 60 frequency-based and duration-based  
255 supercontactors for patients and staff is shown. PVS: persistent-vegetative state.

256

257 **Targeting supercontactors is most effective to reduce MRSA spread**

258 We used supercontactors as target for interventions in the hospital. We compared the effect  
259 of reinforced contact precautions or vaccination, targeting different combinations of 60  
260 supercontactors (*i.e.* contact-based or duration-based supercontactors among both patients  
261 or hospital staff), 60 staff randomly chosen, or 60 patients randomly chosen. Here, we only  
262 show the reductions for an assumed 6-fold reduction in transmission probabilities, with other  
263 fold reductions shown in Supplementary Figure 3.

264 Targeting supercontactors within either staff or patients with an intervention was at least as  
265 effective to reduce incidence than randomly targeting individuals in the same group with the

266 same intervention (grey, Figure 5). When selecting duration-based supercontactors (red),  
267 vaccination targeting patients led to a higher reduction in MRSA colonisations than any  
268 intervention targeting hospital staff (Figure 5). Conversely, when selecting frequency-based  
269 supercontactors (blue), contact precautions targeting hospital staff gave better results in  
270 terms of MRSA colonisations reduction than any intervention targeting patients (Figure 5).  
271 Targeting a mix of half frequency- and half duration-based supercontactors (purple) gave  
272 intermediary results (Figure 5). Regardless of the type of supercontactors targeted, reinforced  
273 contact precautions were more effective than vaccination when targeting staff, whilst  
274 vaccination was more effective than contact precautions when targeting patients (Figure 5).  
275 Overall, vaccination of duration-based patient supercontactors appeared to be the most  
276 effective, with up to 21% (CI: 20-22%) of colonisations prevented. These conclusions are  
277 maintained when assessing different contact precautions or vaccination efficacies, i.e.  
278 assuming 2, 4, 8 or 10-fold reductions in transmission or acquisition probabilities, respectively  
279 (Supplementary Figure 3), or when targeting 20 or 100 individuals instead of 60  
280 (Supplementary Figure 4).

281

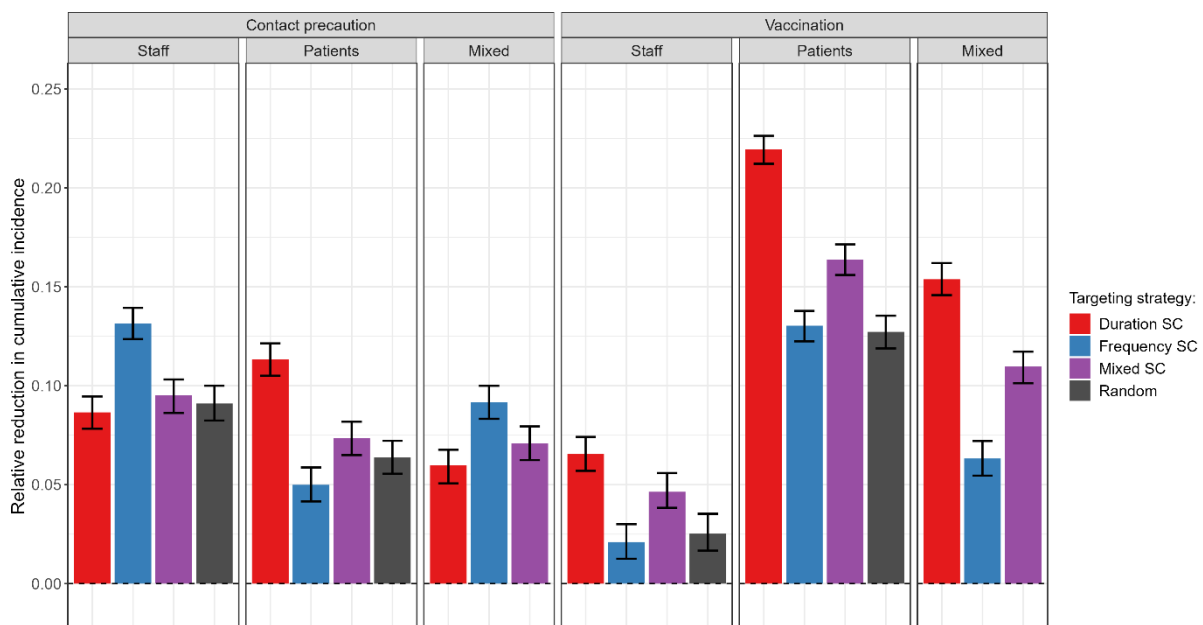

282

283 **Figure 5: Comparison of contact precautions or vaccination for 60 staff, patients, or a mix of**  
284 **staff and patients, targeting either duration-based supercontactors (SC), frequency-based**  
285 **SC, a mix of duration and frequency-based SC, or random individuals. We assume the**

286 interventions lead to a 6-fold reduction in transmission probabilities. For each strategy, the  
287 bar indicates the median relative reduction in cumulative incidence, with 95% confidence  
288 interval, obtained for 500 simulations.

289

## 290 **Targeting supercontactors is also an effective strategy for other nosocomial** 291 **pathogens**

292 Although the epidemiological parameters we used in the previous sections were directly  
293 estimated using data on MRSA, our model can be applied to any nosocomial pathogen for  
294 which close-proximity interactions are the main vector of transmission. Naturally, the  
295 epidemiology of such pathogens would likely vary compared to MRSA, with different  
296 transmission rates and carriage/infectiousness durations compared to the values we  
297 estimated. To investigate the applicability of our results to other pathogens, we repeated our  
298 analysis above, doubling or halving either the transmission rates or the  
299 carriage/infectiousness durations. Our qualitative results on the value of targeting  
300 supercontactors to improve intervention effectiveness remained valid (Figure 6a-d), even with  
301 different baseline incidences due to the parameter changes (Figure 6e). Interestingly, we see  
302 that in a few scenarios targeting patients randomly could be slightly more effective than  
303 targeting frequency-based patient supercontactors (Figure 6a-d). This is due to the high  
304 effectiveness of targeting duration-based patient supercontactors in such instances,  
305 combined with the non-overlapping identities of duration- and frequency-based  
306 supercontactors. Inevitably, by exclusively targeting frequency-based supercontactors we  
307 exclude duration-based supercontactors, while random targeting may still incidentally include  
308 these individuals.



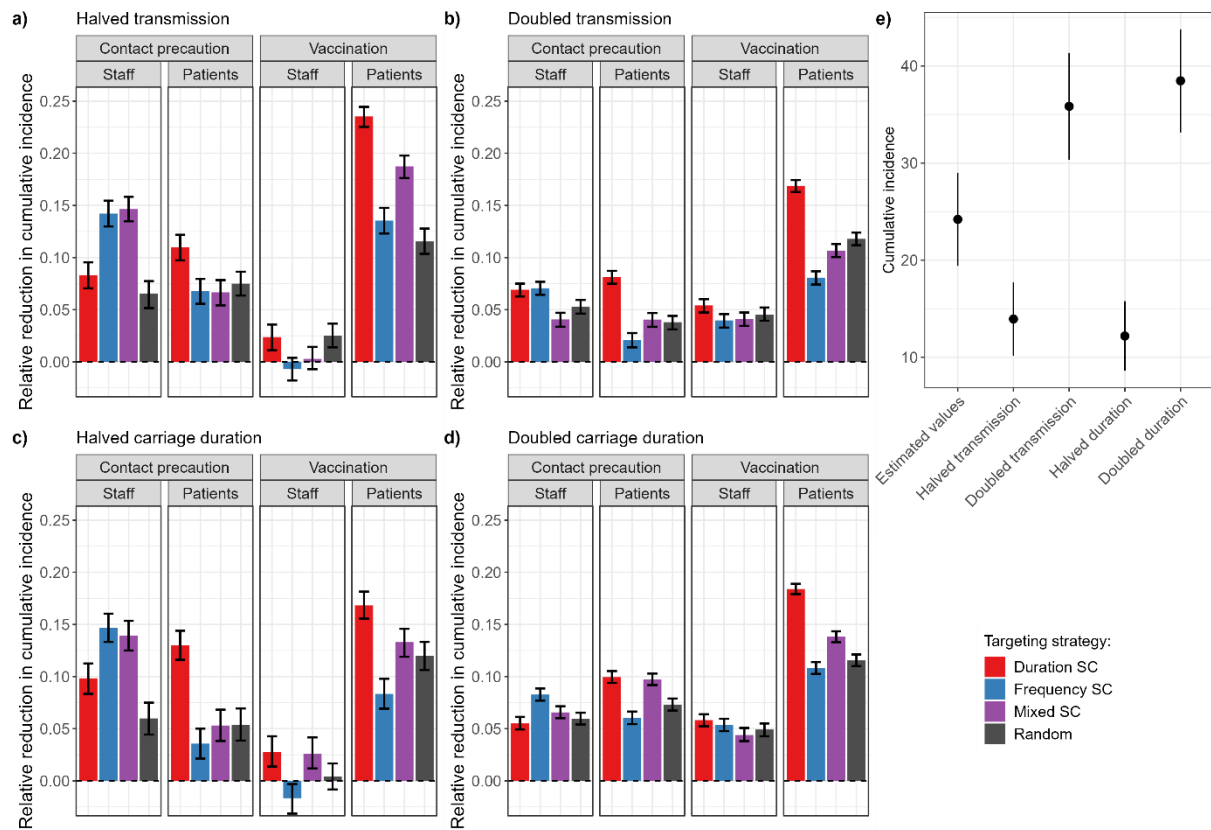

309

310 **Figure 6: Comparison of contact precautions or vaccination for 60 staff or patients, targeting**  
 311 **either duration-based supercontactors (SC), frequency-based SC, a mix of duration and**  
 312 **frequency-based SC, or random individuals, and varying either the baseline transmission**  
 313 **rate or carriage duration. a) Halved transmission rate; b) Doubled transmission rate; c)**  
 314 **Halved carriage duration; d) Doubled carriage duration. We assume the interventions lead**  
 315 **to a 6-fold reduction in transmission probabilities. For each strategy, the bar indicates the**  
 316 **median relative reduction in cumulative incidence, with 95% confidence interval, obtained for**  
 317 **500 simulations. e) Absolute cumulative incidence without intervention using estimated**  
 318 **parameter values, higher/lower transmission, or higher/lower carriage duration. Points**  
 319 **indicate the mean, and lines mean +/- standard deviation, obtained for 500 simulations.**

320

## 321 Discussion

322 In this study, we present how the dynamic interindividual contact network of a healthcare  
323 institution can be analysed to implement efficient interventions aimed at reducing pathogen  
324 transmission. We first applied an individual-based model to a French long-term care facility  
325 and confirmed that it reproduced well both the recorded network and MRSA dynamics. We  
326 then evaluated and compared several network-based control strategies, demonstrating that  
327 while hospital staff reallocation can help reduce MRSA transmission overall, staff contact  
328 precautions and vaccination could be as or more effective than reallocation. Interestingly, the  
329 efficacy varied depending on which staff category was targeted by the intervention. We  
330 identified “supercontactors” in the contact network with more or longer contacts and found  
331 that these were heterogeneously distributed amongst staff and patient categories. The  
332 effectiveness of contact precautions and vaccination was further increased by targeting these  
333 supercontactors in the LTCF, compared to randomly targeting individuals. Our conclusions  
334 remained valid when varying epidemiological parameters, suggesting that targeting  
335 supercontactors is also an effective strategy for other nosocomial pathogens transmitted via  
336 close-proximity interactions.

337 Here we demonstrated that staff reallocation is an efficient strategy to reduce transmission  
338 risk. Moreover, reallocation strategies involving healthcare assistants were the most effective.  
339 Our simulation results are consistent with previous work on this topic, showing the best staff  
340 reallocation strategies were those significantly lowering the degree of the hospital worker-to-  
341 patient subgraph [10,15–21]. In a previous study, we examined the potential of different  
342 hospital staff categories to spread nosocomial pathogens and to play a role of super-spreader,  
343 showing the importance of adherence to contact precautions in “peripatetic” hospital staff.  
344 These later were defined as hospital staff members with relatively short contacts, but with  
345 many patients, a definition similar to the “frequency-based supercontactors” here [8].

346 Since transmission was modelled through the contact network, supercontactors can  
347 mechanistically play the role of super-spreaders, but also be themselves more at risk of  
348 acquiring the bacteria during a contact with a colonised individual. These factors explain why  
349 targeting supercontactors for interventions led to a substantial reduction in colonisation  
350 incidence. The most appropriate supercontactor type to target (duration-based or frequency-

351 based) surprisingly differed between patients and hospital staff: while targeting frequency-  
352 based supercontactors was more relevant for hospital staff, duration-based supercontactors  
353 were selected for patients. We also predicted that the most effective intervention to reduce  
354 the overall incidence of colonisation was to vaccinate duration-based supercontactors  
355 amongst patients with a vaccine, which here we assume protects against acquisition.  
356 Interestingly, in staff, vaccination was less effective than reinforced contact precautions.  
357 These results may be specific to the type of hospital investigated here. In LTCF, the frequency  
358 and duration of patient-patient interactions are much higher than in acute care facilities. Our  
359 results highlight the necessity of involving patients in intervention implementation in LTCF.

360 It is important to note that the hospital followed up during the i-Bird study included neurologic  
361 wards hosting patients in persistent vegetative state (PVS). These PVS patients accounted for  
362 one fifth of the individuals classified as duration-based supercontactors (Figure 3). While they  
363 may be considered similar to sedated and ventilated patients in intensive care units, the  
364 presence of this type of patients with particularly long contacts and specific behaviours is not  
365 universal across all types of LTCF. To improve the generalisability of our results to other LTCF,  
366 we performed an additional analysis in which PVS patients were excluded when identifying  
367 supercontactors: this hypothesis did not affect our conclusions (Supplementary Figure 5).

368 The results presented here should be interpreted in the light of the following limits. Firstly, we  
369 only considered here that MRSA transmission occurred through inter-individual contacts  
370 among participants, with a risk of transmission saturating after one hour. This assumption was  
371 based on previous analysis of the same data, suggesting that the proximity network was the  
372 main transmission route for MRSA acquisition in this setting [11]. In this study, whilst  
373 participation was high (95% of staff and patients agreed to wear the sensors), it was also  
374 estimated that 25% of MRSA acquisitions were not explained by the contact network, and may  
375 instead be mediated by other acquisition mechanisms not included in our model, such as  
376 environmental contamination, or bacterial evolution within the host leading to the emergence  
377 of resistance. Importations of new colonisations, through for example hospital visitors or  
378 patient's permissions outside the hospital were also not included in the model, while they  
379 could also have been sources of MRSA acquisition during the i-Bird study. This may explain  
380 why model simulations slightly underestimated the incidence point on the 6<sup>th</sup> week, as  
381 illustrated in Figure 1b.

382 Secondly, we did not account for the infection status of patients in the model. Over the study,  
383 several infections occurred in participating patients (eschar, cutaneous infection,  
384 gastrostomy, colostomy, tracheotomy, ulcer etc.). When an infection occurs, bacterial load is  
385 usually much higher, which could potentially increase the risk of bacterial dissemination in the  
386 environment or transmission to contacts. Infections could also impact the dynamic of contacts  
387 and of nurse scheduling, as infected patients are bound to have a higher care load, thus  
388 requiring more contacts. Interestingly, this higher care load could reclassify infected patients  
389 as supercontactors and, as we have shown here, identify them as key targets for interventions  
390 to reduce spread. For these reasons, future work taking into consideration infected patients  
391 may further improve our ability to implement effective interventions.

392 Lastly, the epidemiological parameters of the model, which included transmission probability  
393 and carriage duration, were directly estimated for MRSA from the admission, schedule, swab  
394 and contact data [11,12]. However, these parameters can vary depending on the estimation  
395 period (e.g. holidays versus term-time), setting (e.g. long-term versus acute care), population  
396 (e.g. older versus younger), and circulating bacterial or viral pathogen in the hospital. For  
397 example, the probability of MRSA transmission that we estimated is slightly lower than in  
398 other studies (e.g. 0.000023 per 30 seconds of contact on average for hospital staff-to-hospital  
399 staff and 0.000789 for hospital staff-to-patient in our study with the real RFID network,  
400 compared to a probability between 0.0005 and 0.0050 per 30 seconds of contact in the study  
401 by Hornbeck et al [22]). The durations of MRSA colonization that we estimated from the data  
402 (31 days for patients, 27 days for hospital staff) are also either shorter or longer than  
403 previously reported estimates, but these values can be clone or setting-specific [23,24].  
404 Among other pathogens transmitted by close-proximity interactions, *Klebsiella pneumoniae*  
405 has characteristics within the range we explored in our analysis (transmission probability of  
406 0.0005 per 30 seconds of contact, carriage duration of 3 weeks) [25]. SARS-CoV-2 is another  
407 example with a similar transmission probability, although the infectious period (equivalent to  
408 the carriage duration) is lower (9 days) [26]. As we have shown, our conclusions on the value  
409 of interventions strategies targeting supercontactors were not impacted by changes in  
410 parameters to reflect the epidemiology of these other pathogens instead of MRSA.

411 Despite their limitations, mathematical models are powerful tools to inform the efficacy of  
412 control strategies in hospital settings [27], when they are based on a good understanding of

413 pathogen transmission routes and heterogeneity in human interactions [28,29]. Over the last  
414 decades, different approaches have been used to acquire knowledge on interindividual  
415 contacts, such as observational studies, diaries, interviews and more recently wearable  
416 sensors [30–38]. While several IBMs of pathogen spread within hospitals [28,39–47] have  
417 been developed to assess measures such as hygiene compliance [22] or antiviral prophylaxis  
418 impact on influenza [48], few models have actually attempted to directly integrate such rich  
419 empiric data. To our knowledge, only two published individual-based models simulated  
420 transmission along an RFID-based contact network [11,22], one of which studied MRSA spread  
421 [22]. In that work, Hornbeck et al. showed that the number of colonised patients increased  
422 when the most connected nurses did not comply with infection control recommendations,  
423 which is consistent with our results.

424 We must consider the feasibility, cost and social acceptability when deciding which control  
425 strategies should be implemented. For instance, we suggest that the best strategy would be  
426 to implement contact precautions or vaccination focusing on supercontactors, but identifying  
427 and targeting supercontactors, in particular among patients, may not be as socially acceptable  
428 as broadly targeting hospital staff categories. The benefit of patient vaccination, which we  
429 identified as the best strategy in the LTCF, may also be reduced in acute care settings, due to  
430 shorter patient lengths of stay and to the likely delay required for immunity to develop  
431 following vaccination. In addition, here we chose to simulate the impact of the vaccine as a  
432 reduction in the probability of pathogen acquisition, but alternatives could be considered  
433 based on recent clinical trials, for example with the vaccine reducing the risk of infection  
434 rather than colonisation or reducing the risk of transmission from vaccinated individuals [49].  
435 In any case, achieving a 10-fold reduction in transmission probabilities with these  
436 interventions might not actually be feasible, depending on the baseline level of pathogen  
437 transmission, which is why we explored a range of reductions as previous studies have done  
438 [50]. On the other hand, reallocation requires greater logistical efforts, and may not always  
439 be feasible depending on the economic context of the healthcare institution and the care load.  
440 Finally, the most effective reallocation strategies may not be the most “cost-effective”. For  
441 instance, when considering the relative reduction in incidence per staff reallocated, targeting  
442 only rehabilitation staff ranked higher than targeting all staff (Figure 2b).

443 In conclusion, this work sheds light on the importance of targeting control and prevention  
444 measures in an LTCF towards specific hospital staff categories, but also of involving patients  
445 in such efforts as they may too play an important role in the transmission network. Patients  
446 need to be actors of their own prevention especially when their length of stay is long. More  
447 importantly, we underline how monitoring contacts can be helpful to design highly effective  
448 control strategies aimed at “supercontactor” individuals.

## 449 **Materials and methods**

### 450 **Data description**

451 Data used here were previously collected during the Individual-Based Investigation of  
452 Resistance Dissemination (i-Bird) study [11,12], which took place within a rehabilitation and  
453 LTCF from the beginning of July to the end of October 2009. Over this period, each participant  
454 (patient or hospital staff) was wearing an RFID sensor that recorded close-proximity  
455 interactions (CPIs, at less than 1.5m) every 30 seconds. A dynamic network of proximities is  
456 therefore available over 117 days with information on individual ID, ward of affectation, age,  
457 gender etc. In addition, dedicated nurses swabbed patients and hospital staff each week to  
458 detect MRSA colonization.

459 The hospital was structured into five wards: (i) three neurological wards, (ii) one nutritional  
460 care ward and (iii) one geriatric ward. In addition to neurologic, geriatric and nutritional care  
461 patients, the hospital hosted a few persistent vegetative state (PVS), post-operative and  
462 orthopaedic patients. Most patients had long hospitalization durations (median: 7 weeks). In  
463 addition to “classic” staff categories such as nurses, physician, rehabilitation staff, patients  
464 could interact with other staff members, such as hairdressers.

465 Overall, a total of 327 patients and 263 hospital staff had recorded contacts during the  
466 investigation period. This study is described in more detail in [11,12].

467

### 468 **Model description**

469 We developed a stochastic Susceptible-Colonized-Susceptible individual-based model that  
470 simulates the dynamic transmission of a pathogen within a hospital over a network  
471 incorporating data on the detailed structure of CPIs. Individuals could either be patients or  
472 hospital staff members. Hospital staff were divided into six categories: healthcare assistants,  
473 nurses (including nurses, head nurses, and students), rehabilitation staff (occupational  
474 therapists, physiotherapists, and other rehabilitation staff), physicians, hospital porters, and  
475 other staff (animation, logistic, administration, and hospital service agents). The model  
476 accounts for admissions and discharges from the hospital and inter-individual contacts. Once

477 admitted, a patient remains in the hospital until discharged, whereas hospital staff can be  
478 present or absent according to their daily schedule. A probability per time unit for hospital  
479 staff presence simulates this schedule.

#### 480 ***Transmission process***

481 Every individual can either be colonized or non-colonized (susceptible) by the pathogen (here,  
482 MRSA). At each contact between a susceptible and a colonized individual, the pathogen can  
483 be transmitted from the colonized to the susceptible individual with a given probability. This  
484 transmission probability is computed as the product of the between-individual contact  
485 duration and the pathogen-specific transmission probability, assuming that risks saturate  
486 after 1 hour. The model accounts for four different transmission probabilities depending on  
487 the status of the individuals involved: patient-to-patient, patient-to-staff, staff-to-patient and  
488 staff-to-staff (see Supplementary Text 1). A colonized individual can naturally recover to the  
489 susceptible state after a colonization duration randomly drawn from a lognormal distribution.  
490 Such individuals may subsequently be recolonised (no immunity is assumed). We also assume  
491 that no active decolonisation measures are implemented.

492 Individuals are assumed to be screened for colonization with a probability estimated from the  
493 data that depends on weekdays.

#### 494 ***Model parameterization***

495 The model was parameterized using i-Bird data. Simulations ran over 84 days, with an initial  
496 151 patients and 236 hospital staff members present, to reflect the duration and conditions  
497 of the data collection. Values for model parameters were also computed from the observed  
498 data on MRSA colonization among the patients and hospital staff. A summary list of model  
499 parameters is provided in Table S2. Detailed information on parameter value calculations is  
500 provided in Supplementary Text 1.

501

#### 502 **Building synthetic contacts**

503 We built an algorithm to generate both realistic full and reported stochastic dynamic networks  
504 of interindividual interactions in the hospital using parameters estimated from the observed



505 data. Details of parameters computations and CPI generation algorithm are provided in  
506 reference [13].

507

## 508 **Implementing control strategies**

509 We evaluated three distinct contact-based control strategies: staff reallocation, contact  
510 precautions, and vaccination.

511 *Reallocation* was simulated as a modification of the contact network, in which patients were  
512 allocated to a given staff member of each category for their entire length of stay. We then  
513 generated contacts using the algorithm we previously described [13], choosing in priority the  
514 staff member allocated to that patient (or vice-versa) when a corresponding contact occurred.  
515 For example, if we allocate patient  $p1$  to nurse  $n1$ , then nurse  $n1$  will systematically be chosen  
516 in priority whenever the algorithm attempts to create a contact between  $p1$  and a nurse. We  
517 assumed that reallocation did not influence CPI rates.

518 *Contact precautions* were simulated by reducing instantaneous patient-to-hospital staff and  
519 hospital staff-to-patient transmissions probabilities 2-, 4-, 6-, 8- or 10-fold, irrespective of CPI  
520 rates. Three specific scenarios were investigated: (i) contact precautions for all members of  
521 different staff categories, (ii) contact precautions for 60 randomly selected staff members  
522 amongst nurses or all staff, and (iii) contact precautions for 60 individuals with the highest  
523 rates of contacts, called “supercontactors”. Two definitions of supercontactors were assessed:  
524 (i) based on the number of contacts (henceforth called “frequency-based supercontactors”)  
525 and (ii) based on the duration of contact (henceforth called “duration-based  
526 supercontactors”). Frequency-based supercontactors were defined as the patients or hospital  
527 staff members who had the highest mean number of daily contacts with distinct individuals.  
528 Duration-based supercontactors were defined as the patients or hospital staff members who  
529 had the highest mean daily cumulative duration spent in contact with other individuals.  
530 Several strategies were explored regarding the type (patients and/or staff members) of  
531 selected supercontactors on whom to focus reinforced contact precautions.

532 *Vaccination* was simulated by reducing acquisition probabilities for vaccinated individuals by  
533 2-, 4-, 6-, 8- or 10-fold, irrespective of CPI rates. This effectively corresponds to an

534 unvaccinated-to-vaccinated transmission probability reduction, regardless of the categories  
535 of individuals in contact (staff or patient). For example, a 6-fold reduction would translate into  
536 a vaccine efficacy of  $1 - 1/6 = 83\%$  to reduce the risk of acquisition. We examined the same  
537 scenarios as for contact precautions. We assume that the vaccine has been administered with  
538 sufficient time before the simulation, and therefore do not consider a delay before reaching  
539 maximum vaccine efficacy. We also do not account for potentially waning immunity due to  
540 the relatively short time period of our simulation.

541 For all interventions and scenarios, the relative reduction in the cumulative incidence of MRSA  
542 colonisation over the entire simulation period was used as an indicator of intervention  
543 efficacy. This was calculated by simulating each scenario (including baseline) 500 times and  
544 comparing each simulation result with 10 randomly chosen simulations of the baseline  
545 scenario, leading to a total of 5000 comparison points per scenario. We used a Wilcoxon test  
546 to check if the median relative reduction in cumulative incidence was significantly different  
547 from 0.

548 We used the model to simulate the impact of these control strategies for other pathogens  
549 than MRSA. To represent the varying epidemiological characteristics of these pathogens, we  
550 either doubled or halved the values for the transmission rate or carriage duration (i.e.  
551 infectious period) compared to the values we estimated from the data.

552

## 553 **Acknowledgements and funding sources**

554 This project has received funding from the Innovative Medicines Initiative 2 Joint Undertaking  
555 under grant agreement No 101034420 (PrIMAVeRa). This Joint Undertaking receives support  
556 from the European Union's Horizon 2020 research and innovation programme and EFPIA.

557 This communication reflects the author's view and that neither IMI nor the European Union,  
558 EFPIA, or any Associated Partners are responsible for any use that may be made of the  
559 information contained therein.

## 560 References

- 561 1. World Health Organization. Report on the burden of endemic health care-associated infection  
562 worldwide. World Health Organization; 2011. Available:  
563 <https://apps.who.int/iris/handle/10665/80135>
- 564 2. Vanhems P, Von Raesfeldt R, Ecochard R, Voirin N. Emergence of Ebola virus disease in a french  
565 acute care setting: a simulation study based on documented inter-individual contacts. *Sci Rep*.  
566 2016;6: 36301. doi:10.1038/srep36301
- 567 3. Rudberg A-S, Havervall S, Månberg A, Jernbom Falk A, Aguilera K, Ng H, et al. SARS-CoV-2  
568 exposure, symptoms and seroprevalence in healthcare workers in Sweden. *Nat Commun*.  
569 2020;11: 5064. doi:10.1038/s41467-020-18848-0
- 570 4. World Health Organization. Global antimicrobial resistance and use surveillance system (GLASS)  
571 report: 2022. 2022 Dec. Available: [https://www.who.int/publications-detail-  
572 redirect/9789240062702](https://www.who.int/publications-detail-redirect/9789240062702)
- 573 5. O’Gara JP. Into the storm: Chasing the opportunistic pathogen *Staphylococcus aureus* from skin  
574 colonisation to life-threatening infections. *Environmental Microbiology*. 2017;19: 3823–3833.  
575 doi:10.1111/1462-2920.13833
- 576 6. Huang SS, Platt R. Risk of methicillin-resistant *Staphylococcus aureus* infection after previous  
577 infection or colonization. *Clin Infect Dis*. 2003;36: 281–285. doi:10.1086/345955
- 578 7. Atkins KE, Lafferty EI, Deeny SR, Davies NG, Robotham JV, Jit M. Use of mathematical modelling  
579 to assess the impact of vaccines on antibiotic resistance. *The Lancet Infectious Diseases*.  
580 2018;18: e204–e213. doi:10.1016/S1473-3099(17)30478-4
- 581 8. Temime L, Opatowski L, Pannet Y, Brun-Buisson C, Boëlle PY, Guillemot D. Peripatetic health-  
582 care workers as potential superspreaders. *Proc Natl Acad Sci USA*. 2009;106: 18420–18425.  
583 doi:10.1073/pnas.0900974106
- 584 9. Curtis DE, Hlady CS, Kanade G, Pemmaraju SV, Polgreen PM, Segre AM. Healthcare Worker  
585 Contact Networks and the Prevention of Hospital-Acquired Infections. *PLOS ONE*. 2013;8:  
586 e79906. doi:10.1371/journal.pone.0079906
- 587 10. Valdano E, Poletto C, Boëlle P-Y, Colizza V. Reorganization of nurse scheduling reduces the risk  
588 of healthcare associated infections. *Sci Rep*. 2021;11: 7393. doi:10.1038/s41598-021-86637-w
- 589 11. Obadia T, Silhol R, Opatowski L, Temime L, Legrand J, Thiébaud ACM, et al. Detailed Contact  
590 Data and the Dissemination of *Staphylococcus aureus* in Hospitals. Salathé M, editor. *PLOS*  
591 *Computational Biology*. 2015;11: e1004170. doi:10.1371/journal.pcbi.1004170
- 592 12. Duval A, Obadia T, Martinet L, Boëlle P-Y, Fleury E, Guillemot D, et al. Measuring dynamic social  
593 contacts in a rehabilitation hospital: effect of wards, patient and staff characteristics. *Scientific*  
594 *Reports*. 2018;8: 1686. doi:10.1038/s41598-018-20008-w
- 595 13. Duval A, Leclerc QJ, Guillemot D, Temime L, Opatowski L. An algorithm to build synthetic  
596 temporal contact networks based on close-proximity interactions data. *medRxiv*. 2023.  
597 doi:10.1101/2023.10.23.23296945

- 598 14. Obadia T, Opatowski L, Temime L, Herrmann J-L, Fleury É, Boëlle P-Y, et al. Interindividual  
599 Contacts and Carriage of Methicillin-Resistant *Staphylococcus aureus*: A Nested Case-Control  
600 Study. *Infection Control & Hospital Epidemiology*. 2015;36: 922–929. doi:10.1017/ice.2015.89
- 601 15. Beggs CB, Noakes CJ, Shepherd SJ, Kerr KG, Sleigh PA, Banfield K. The influence of nurse  
602 cohorting on hand hygiene effectiveness. *American Journal of Infection Control*. 2006;34: 621–  
603 626. doi:10.1016/j.ajic.2006.06.011
- 604 16. Hussein K, Rabino G, Eluk O, Warman S, Reisner S, Geffen Y, et al. The association between  
605 infection control interventions and carbapenem-resistant Enterobacteriaceae incidence in an  
606 endemic hospital. *Journal of Hospital Infection*. 2017;97: 218–225.  
607 doi:10.1016/j.jhin.2017.07.018
- 608 17. Jochimsen EM, Fish L, Manning K, Young S, Singer DA, Baker R, et al. Control of Vancomycin-  
609 Resistant Enterococci at a Community Hospital: Efficacy of Patient and Staff Cohorting. *Infect  
610 Control Hosp Epidemiol*. 1999;20: 106–109. doi:10.1086/501598
- 611 18. Meyers LA, Newman MEJ, Martin M, Schrag S. Applying Network Theory to Epidemics: Control  
612 Measures for *Mycoplasma pneumoniae* Outbreaks. *Emerg Infect Dis*. 2003;9: 204–210.  
613 doi:10.3201/eid0902.020188
- 614 19. Austin DJ, Bonten MJM, Weinstein RA, Slaughter S, Anderson RM. Vancomycin-resistant  
615 enterococci in intensive-care hospital settings: Transmission dynamics, persistence, and the  
616 impact of infection control programs. *Proc Natl Acad Sci U S A*. 1999;96: 6908–6913.
- 617 20. Pelat C, Kardaś-Stoma L, Birgand G, Ruppé E, Schwarzinger M, Andremont A, et al. Hand  
618 Hygiene, Cohorting, or Antibiotic Restriction to Control Outbreaks of Multidrug-Resistant  
619 *Enterobacteriaceae*. *Infect Control Hosp Epidemiol*. 2016;37: 272–280.  
620 doi:10.1017/ice.2015.284
- 621 21. Abad CL, Barker AK, Safdar N. A systematic review of the effectiveness of cohorting to reduce  
622 transmission of healthcare-associated *C. difficile* and multidrug-resistant organisms. *Infect  
623 Control Hosp Epidemiol*. 2020;41: 691–709. doi:10.1017/ice.2020.45
- 624 22. Hornbeck T, Naylor D, Segre AM, Thomas G, Herman T, Polgreen PM. Using sensor networks to  
625 study the effect of peripatetic healthcare workers on the spread of hospital-associated  
626 infections. *J Infect Dis*. 2012;206: 1549–1557. doi:10.1093/infdis/jjs542
- 627 23. Cluzet VC, Gerber JS, Nachamkin I, Metlay JP, Zaoutis TE, Davis MF, et al. Duration of  
628 Colonization and Determinants of Earlier Clearance of Colonization With Methicillin-Resistant  
629 *Staphylococcus aureus*. *Clinical Infectious Diseases*. 2015;60: 1489–1496.  
630 doi:10.1093/cid/civ075
- 631 24. Robicsek A, Beaumont JL, Peterson LR. Duration of Colonization with Methicillin - Resistant  
632 *Staphylococcus aureus*. *CLIN INFECT DIS*. 2009;48: 910–913. doi:10.1086/597296
- 633 25. Duval A, Obadia T, Boëlle P-Y, Fleury E, Herrmann J-L, Guillemot D, et al. Close proximity  
634 interactions support transmission of ESBL-K. pneumoniae but not ESBL-E. coli in healthcare  
635 settings. *PLOS Computational Biology*. 2019;15: e1006496. doi:10.1371/journal.pcbi.1006496
- 636 26. Smith DRM, Duval A, Pouwels KB, Guillemot D, Fernandes J, Huynh B-T, et al. Optimizing COVID-  
637 19 surveillance in long-term care facilities: a modelling study. *BMC Medicine*. 2020;18: 386.  
638 doi:10.1186/s12916-020-01866-6

- 639 27. Grundmann H, Hellriegel B. Mathematical modelling: a tool for hospital infection control. The  
640 Lancet Infectious Diseases. 2006;6: 39–45. doi:10.1016/S1473-3099(05)70325-X
- 641 28. Polgreen PM, Tassier TL, Pemmaraju SV, Segre AM. Prioritizing Healthcare Worker Vaccinations  
642 on the Basis of Social Network Analysis. Infection Control & Hospital Epidemiology. 2010;31:  
643 893–900. doi:10.1086/655466
- 644 29. Assab R, Temime L. The role of hand hygiene in controlling norovirus spread in nursing homes.  
645 BMC Infect Dis. 2016;16: 395. doi:10.1186/s12879-016-1702-0
- 646 30. Mossong J, Hens N, Jit M, Beutels P, Auranen K, Mikolajczyk R, et al. Social Contacts and Mixing  
647 Patterns Relevant to the Spread of Infectious Diseases. PLOS Medicine. 2008;5: e74.  
648 doi:10.1371/journal.pmed.0050074
- 649 31. Champredon D, Najafi M, Laskowski M, Chit A, M. Moghadas S, 1 Agent-Based Modelling  
650 Laboratory, York University, Toronto, ON M3J 1P3, Canada, et al. Individual movements and  
651 contact patterns in a Canadian long-term care facility. AIMS Public Health. 2018;5: 111–121.  
652 doi:10.3934/publichealth.2018.2.111
- 653 32. Lowery-North DW, Hertzberg VS, Elon L, Cotsonis G, Hilton SA, Vaughns CF, et al. Measuring  
654 Social Contacts in the Emergency Department. Sueur C, editor. PLoS ONE. 2013;8: e70854.  
655 doi:10.1371/journal.pone.0070854
- 656 33. Isella L, Romano M, Barrat A, Cattuto C, Colizza V, Van den Broeck W, et al. Close Encounters in  
657 a Pediatric Ward: Measuring Face-to-Face Proximity and Mixing Patterns with Wearable  
658 Sensors. Cowling B, editor. PLoS ONE. 2011;6: e17144. doi:10.1371/journal.pone.0017144
- 659 34. Lucet J-C, Laouenan C, Chelius G, Veziris N, Lepelletier D, Friggeri A, et al. Electronic Sensors for  
660 Assessing Interactions between Healthcare Workers and Patients under Airborne Precautions.  
661 Colizza V, editor. PLoS ONE. 2012;7: e37893. doi:10.1371/journal.pone.0037893
- 662 35. Mastrandrea R, Soto-Aladro A, Brouqui P, Barrat A. Enhancing the evaluation of pathogen  
663 transmission risk in a hospital by merging hand-hygiene compliance and contact data: a proof-  
664 of-concept study. BMC Res Notes. 2015;8: 426. doi:10.1186/s13104-015-1409-0
- 665 36. Voirin N, Payet C, Barrat A, Cattuto C, Khanafer N, Régis C, et al. Combining High-Resolution  
666 Contact Data with Virological Data to Investigate Influenza Transmission in a Tertiary Care  
667 Hospital. Infect Control Hosp Epidemiol. 2015;36: 254–260. doi:10.1017/ice.2014.53
- 668 37. Herman T, Monsalve M, Pemmaraju S, Polgreen P, Segre AM, Sharma D, et al. Inferring Realistic  
669 Intra-hospital Contact Networks Using Link Prediction and Computer Logins. 2012 International  
670 Conference on Privacy, Security, Risk and Trust and 2012 International Confernece on Social  
671 Computing. Amsterdam, Netherlands: IEEE; 2012. pp. 572–578. doi:10.1109/SocialCom-  
672 PASSAT.2012.113
- 673 38. Vanhems P, Barrat A, Cattuto C, Pinton J-F, Khanafer N, Régis C, et al. Estimating Potential  
674 Infection Transmission Routes in Hospital Wards Using Wearable Proximity Sensors. Viboud C,  
675 editor. PLoS ONE. 2013;8: e73970. doi:10.1371/journal.pone.0073970
- 676 39. Almagor J, Temkin E, Benenson I, Fallach N, Carmeli Y, on behalf of the DRIVE-AB consortium.  
677 The impact of antibiotic use on transmission of resistant bacteria in hospitals: Insights from an  
678 agent-based model. Zhou Z, editor. PLoS ONE. 2018;13: e0197111.  
679 doi:10.1371/journal.pone.0197111

- 680 40. Lanzas C, Dubberke ER. Effectiveness of Screening Hospital Admissions to Detect Asymptomatic  
681 Carriers of *Clostridium difficile* : A Modeling Evaluation. *Infect Control Hosp Epidemiol*. 2014;35:  
682 1043–1050. doi:10.1086/677162
- 683 41. Caudill L, Lawson B. A unified inter-host and in-host model of antibiotic resistance and infection  
684 spread in a hospital ward. *Journal of Theoretical Biology*. 2017;421: 112–126.  
685 doi:10.1016/j.jtbi.2017.03.025
- 686 42. Barker AK, Alagoz O, Safdar N. Interventions to Reduce the Incidence of Hospital-Onset  
687 *Clostridium difficile* Infection: An Agent-Based Modeling Approach to Evaluate Clinical  
688 Effectiveness in Adult Acute Care Hospitals. *Clinical Infectious Diseases*. 2018;66: 1192–1203.  
689 doi:10.1093/cid/cix962
- 690 43. Codella J, Safdar N, Heffernan R, Alagoz O. An Agent-based Simulation Model for *Clostridium*  
691 *difficile* Infection Control. *Med Decis Making*. 2015;35: 211–229.  
692 doi:10.1177/0272989X14545788
- 693 44. D’Agata EMC, Horn MA, Webb GF. The Impact of Persistent Gastrointestinal Colonization on  
694 the Transmission Dynamics of Vancomycin - Resistant Enterococci. *J INFECT DIS*. 2002;185:  
695 766–773. doi:10.1086/339293
- 696 45. Rubin MA, Jones M, Leecaster M, Khader K, Ray W, Huttner A, et al. A Simulation-Based  
697 Assessment of Strategies to Control *Clostridium Difficile* Transmission and Infection. Trotter CL,  
698 editor. *PLoS ONE*. 2013;8: e80671. doi:10.1371/journal.pone.0080671
- 699 46. Barnes SL, Rock C, Harris AD, Cosgrove SE, Morgan DJ, Thom KA. The Impact of Reducing  
700 Antibiotics on the Transmission of Multidrug-Resistant Organisms. *Infect Control Hosp*  
701 *Epidemiol*. 2017;38: 663–669. doi:10.1017/ice.2017.34
- 702 47. Ferrer J, Salmon M, Temime L. Nosolink: An Agent-based Approach to Link Patient Flows and  
703 Staff Organization with the Circulation of Nosocomial Pathogens in an Intensive Care Unit.  
704 *Procedia Computer Science*. 2013;18: 1485–1494. doi:10.1016/j.procs.2013.05.316
- 705 48. Najafi M, Laskowski M, de Boer PT, Williams E, Chit A, Moghadas SM. The Effect of Individual  
706 Movements and Interventions on the Spread of Influenza in Long-Term Care Facilities. *Med*  
707 *Decis Making*. 2017;37: 871–881. doi:10.1177/0272989X17708564
- 708 49. Clegg J, Soldaini E, McLoughlin RM, Rittenhouse S, Bagnoli F, Phogat S. *Staphylococcus aureus*  
709 Vaccine Research and Development: The Past, Present and Future, Including Novel Therapeutic  
710 Strategies. *Front Immunol*. 2021;12: 705360. doi:10.3389/fimmu.2021.705360
- 711 50. Hoge C, Van Effelterre T, Cassidy A. A model-based analysis: what potential could there be for  
712 a *S. aureus* vaccine in a hospital setting on top of other preventative measures? *BMC Infectious*  
713 *Diseases*. 2014;14: 291. doi:10.1186/1471-2334-14-291
- 714 51. Duval A, Smith D, Guillemot D, Opatowski L, Temime L. CTCmodeler: An Agent-Based  
715 Framework to Simulate Pathogen Transmission Along an Inter-individual Contact Network in a  
716 Hospital. In: Rodrigues JMF, Cardoso PJS, Monteiro J, Lam R, Krzhizhanovskaya VV, Lees MH, et  
717 al., editors. *Computational Science – ICCS 2019*. Springer International Publishing; 2019. pp.  
718 477–487. doi:10.1007/978-3-030-22741-8\_34
